# Supplementary material
Source: Springer Nature journal article supplement (https://www.springermedizin.de/resource/supplementary/12968_2009_942_MOESM4_ESM.pdf/9580006)

Q  
p  
/  
Q  
s

1.5  
1.4  
1.3  
1.2  
1.1  
1.0  
0.9  
0.8  
0.7

**Before Phantom  
Correction**  
Mean 1.1  
Standard Deviation 0.2

**After Phantom  
Correction**  
Mean 1.0  
Standard Deviation 0.1

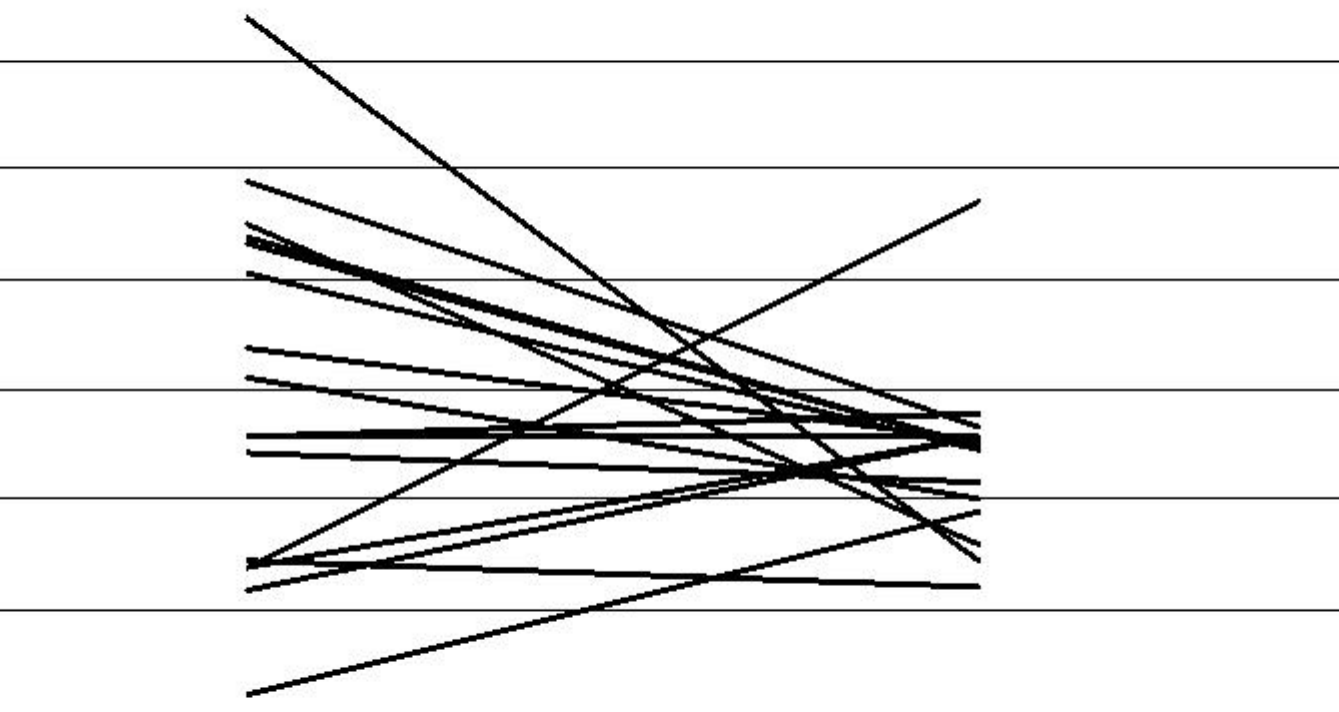

Supplement: MOESM4 [file 9580006]
